# Supplementary material
Source: PubMed Central journal article supplement (PMC4793392)
Supplement: wuh006956.ww2_default.pdf [file wuh006956.ww2_default.pdf]

**Supplementary Table A. Assessment of heterogeneity and publication bias for trials included in traditional pair-wise meta-analyses**

| Treatment comparisons               | $I^2$ | <i>P</i> value of Cochrane Q-test | <i>P</i> value of Egger's test | <i>P</i> value of Begg's test |
|-------------------------------------|-------|-----------------------------------|--------------------------------|-------------------------------|
| <b>All-cause mortality</b>          |       |                                   |                                |                               |
| ACEI vs Placebo                     | 0.0%  | 0.80                              | 0.83                           | 0.22                          |
| ARB vs Placebo                      | 0.0%  | 0.85                              | 0.22                           | 0.21                          |
| CCB vs Placebo                      | 0.0%  | 0.49                              | 0.96                           | 0.60                          |
| ARB vs ACEI                         | 0.0%  | 0.95                              | NA                             | 0.32                          |
| ACEI+CCB vs ACEI                    | 0.0%  | 0.84                              | NA                             | 0.32                          |
| ACEI vs CCB                         | 0.0%  | 0.81                              | 0.90                           | 1.00                          |
| ACEI+CCB vs CCB                     | 0.0%  | 0.58                              | NA                             | 0.32                          |
| ACEI vs Beta-blocker                | 0.0%  | 0.98                              | NA                             | 0.32                          |
| <b>End-stage renal disease</b>      |       |                                   |                                |                               |
| ACEI vs Placebo                     | 0.0%  | 0.62                              | 0.72                           | 0.50                          |
| ARB vs Placebo                      | 0.0%  | 0.73                              | NA                             | 0.32                          |
| ACEI vs CCB                         | 0.0%  | 0.84                              | NA                             | 0.32                          |
| ACEI vs Beta-blocker                | 0.0%  | 0.88                              | NA                             | 0.32                          |
| <b>Doubling of serum creatinine</b> |       |                                   |                                |                               |
| ACEI vs Placebo                     | 24.7% | 0.25                              | 0.36                           | 0.35                          |
| ARB vs Placebo                      | 0.0%  | 0.40                              | 0.65                           | 0.60                          |

Note.  $P < 0.05$  indicates significant heterogeneity in Cochrane Q-test, publication bias in Egger's test, or publication bias in Begg's test. ACEI, angiotensin-converting enzyme inhibitor; ARB, angiotensin receptor blocker; CCB, calcium channel blocker; NA, not applicable due to scarce trial numbers.

**Supplementary Table B. Quality assessment of risk of bias for trials included in network meta-analysis**

| Trial                               | Year | Random sequence generation | Allocation concealment | Blinding of participants and personnel | Blinding of outcome assessment | Incomplete outcome data | Selective reporting | Other bias   |
|-------------------------------------|------|----------------------------|------------------------|----------------------------------------|--------------------------------|-------------------------|---------------------|--------------|
| Parving et al. <sup>1,2</sup>       | 1989 | Unclear risk               | Unclear risk           | High risk                              | Low risk                       | Low risk                | Low risk            | Low risk     |
| Bauer et al. <sup>3</sup>           | 1992 | Unclear risk               | Unclear risk           | Low risk                               | Low risk                       | Low risk                | Low risk            | Low risk     |
| Björck et al. <sup>4</sup>          | 1992 | Unclear risk               | Unclear risk           | High risk                              | Low risk                       | Low risk                | Low risk            | Low risk     |
| Chan et al. <sup>5</sup>            | 1992 | Unclear risk               | Unclear risk           | Low risk                               | Low risk                       | Low risk                | Low risk            | Low risk     |
| Chase et al. <sup>6</sup>           | 1993 | Unclear risk               | Unclear risk           | Low risk                               | Unclear risk                   | Low risk                | Unclear risk        | Low risk     |
| Hallab et al. <sup>7</sup>          | 1993 | Low risk                   | Low risk               | Low risk                               | Low risk                       | Low risk                | Low risk            | Low risk     |
| Lewis et al. <sup>8</sup>           | 1993 | Unclear risk               | Unclear risk           | Low risk                               | Low risk                       | Low risk                | Low risk            | Low risk     |
| O'Donnell et al. <sup>9</sup>       | 1993 | Unclear risk               | Unclear risk           | Low risk                               | Low risk                       | Low risk                | Low risk            | Low risk     |
| Ravid et al. <sup>10</sup>          | 1993 | Unclear risk               | Unclear risk           | Low risk                               | Low risk                       | Low risk                | Low risk            | Low risk     |
| Bakris et al. <sup>11</sup>         | 1994 | Unclear risk               | Low risk               | High risk                              | Unclear risk                   | Low risk                | Low risk            | Low risk     |
| Capek et al. <sup>12</sup>          | 1994 | Unclear risk               | Unclear risk           | Low risk                               | Low risk                       | Low risk                | Low risk            | Unclear risk |
| Elving et al. <sup>13</sup>         | 1994 | Unclear risk               | Unclear risk           | High risk                              | Low risk                       | Low risk                | Low risk            | Low risk     |
| Sano et al. <sup>14</sup>           | 1994 | Unclear risk               | Unclear risk           | High risk                              | Low risk                       | Low risk                | Low risk            | Low risk     |
| Laffel et al. <sup>15</sup>         | 1995 | Unclear risk               | Unclear risk           | Low risk                               | Low risk                       | Low risk                | Low risk            | Low risk     |
| Bakris et al. <sup>16</sup>         | 1996 | Unclear risk               | Unclear risk           | High risk                              | Low risk                       | Low risk                | Low risk            | Low risk     |
| Viberti et al. <sup>17</sup>        | 1996 | Unclear risk               | Unclear risk           | Low risk                               | Low risk                       | Low risk                | Low risk            | Low risk     |
| Nielsen et al. <sup>18,19</sup>     | 1997 | Unclear risk               | Unclear risk           | Unclear risk                           | Low risk                       | Low risk                | Low risk            | Low risk     |
| ABCD. <sup>20</sup>                 | 1998 | Low risk                   | Low risk               | Low risk                               | Low risk                       | Low risk                | Low risk            | Low risk     |
| Bakris et al. <sup>21</sup>         | 1998 | Unclear risk               | Unclear risk           | High risk                              | Low risk                       | Low risk                | Low risk            | Low risk     |
| Crepaldi et al. <sup>22</sup>       | 1998 | Unclear risk               | Unclear risk           | Low risk                               | Low risk                       | Low risk                | Low risk            | Low risk     |
| FACET. <sup>23</sup>                | 1998 | Low risk                   | Low risk               | Unclear risk                           | Low risk                       | Low risk                | Low risk            | Low risk     |
| Garg et al. <sup>24</sup>           | 1998 | Unclear risk               | Unclear risk           | Low risk                               | Unclear risk                   | Low risk                | Unclear risk        | Unclear risk |
| Nankervis et al. <sup>25</sup>      | 1998 | Unclear risk               | Unclear risk           | Low risk                               | Low risk                       | Low risk                | Low risk            | Low risk     |
| Ravid et al. <sup>26</sup>          | 1998 | Low risk                   | Low risk               | Low risk                               | Low risk                       | Unclear risk            | Low risk            | Low risk     |
| Cordonnier et al. <sup>27</sup>     | 1999 | Unclear risk               | Unclear risk           | Low risk                               | Low risk                       | Low risk                | Low risk            | Low risk     |
| Fogari et al. <sup>28</sup>         | 1999 | Unclear risk               | Unclear risk           | Unclear risk                           | Low risk                       | Unclear risk            | Low risk            | Low risk     |
| Mathiesen et al. <sup>29,30</sup>   | 1999 | Unclear risk               | Unclear risk           | High risk                              | Low risk                       | Unclear risk            | Low risk            | Unclear risk |
| Muirhead et al. <sup>31</sup>       | 1999 | Unclear risk               | Unclear risk           | Low risk                               | Low risk                       | Low risk                | Low risk            | Low risk     |
| ATLANTIS. <sup>32</sup>             | 2000 | Unclear risk               | Low risk               | High risk                              | Low risk                       | Unclear risk            | Low risk            | Low risk     |
| Lacourcière et al. <sup>33</sup>    | 2000 | Unclear risk               | Unclear risk           | Low risk                               | Low risk                       | Low risk                | Low risk            | Low risk     |
| Tarnow. <sup>34</sup>               | 2000 | Unclear risk               | Low risk               | Unclear risk                           | Low risk                       | Low risk                | Low risk            | Low risk     |
| Bojestig et al. <sup>35</sup>       | 2001 | Unclear risk               | Unclear risk           | Low risk                               | Low risk                       | Low risk                | Low risk            | Low risk     |
| Deerochanawong et al. <sup>36</sup> | 2001 | Unclear risk               | Unclear risk           | High risk                              | Low risk                       | Low risk                | Low risk            | Low risk     |
| ESPRIT. <sup>37</sup>               | 2001 | Unclear risk               | Unclear risk           | Low risk                               | Low risk                       | Low risk                | Low risk            | Low risk     |
| IDNT. <sup>38</sup>                 | 2001 | Unclear risk               | Low risk               | Low risk                               | Low risk                       | Low risk                | Low risk            | Low risk     |
| IRMA-2. <sup>39</sup>               | 2001 | Unclear risk               | Unclear risk           | Low risk                               | Low risk                       | Low risk                | Low risk            | Low risk     |
| Jerums. <sup>40</sup>               | 2001 | Unclear risk               | Low risk               | Low risk                               | Low risk                       | Low risk                | Low risk            | Low risk     |
| Kopf et al. <sup>41</sup>           | 2001 | Unclear risk               | Unclear risk           | Low risk                               | Low risk                       | Low risk                | Low risk            | Low risk     |
| Kventy et al. <sup>42</sup>         | 2001 | Unclear risk               | Unclear risk           | Low risk                               | Low risk                       | Low risk                | Low risk            | Low risk     |
| RENAAL. <sup>43</sup>               | 2001 | Low risk                   | Unclear risk           | Low risk                               | Low risk                       | Low risk                | Low risk            | Low risk     |
| Fogari et al. <sup>44</sup>         | 2002 | Low risk                   | Low risk               | High risk                              | Low risk                       | Low risk                | Low risk            | Low risk     |
| JAPAN-IDDM. <sup>45</sup>           | 2002 | Unclear risk               | Low risk               | Low risk                               | Low risk                       | Low risk                | Low risk            | Low risk     |
| BENEDICT. <sup>46</sup>             | 2004 | Unclear risk               | Unclear risk           | Low risk                               | Low risk                       | Low risk                | Low risk            | Low risk     |
| DETAIL. <sup>47,48</sup>            | 2004 | Low risk                   | Low risk               | Low risk                               | Low risk                       | Low risk                | Low risk            | Low risk     |
| DIABHYCAR. <sup>49</sup>            | 2004 | Low risk                   | Low risk               | Low risk                               | Low risk                       | Low risk                | Low risk            | Low risk     |
| NESTOR. <sup>50</sup>               | 2004 | Unclear risk               | Unclear risk           | Low risk                               | Low risk                       | Low risk                | Low risk            | Low risk     |
| Ko et al. <sup>51</sup>             | 2005 | Unclear risk               | Low risk               | High risk                              | Low risk                       | Low risk                | Low risk            | Low risk     |

**Supplementary Table B.** Continued.

| <b>Trial</b>                    | <b>Year</b> | <b>Random sequence generation</b> | <b>Allocation concealment</b> | <b>Blinding of participants and personnel</b> | <b>Blinding of outcome assessment</b> | <b>Incomplete outcome data</b> | <b>Selective reporting</b> | <b>Other bias</b> |
|---------------------------------|-------------|-----------------------------------|-------------------------------|-----------------------------------------------|---------------------------------------|--------------------------------|----------------------------|-------------------|
| Rizzoni et al. <sup>52</sup>    | 2005        | Unclear risk                      | Unclear risk                  | Low risk                                      | Unclear risk                          | Low risk                       | Low risk                   | Low risk          |
| Schram et al. <sup>53</sup>     | 2005        | Unclear risk                      | Unclear risk                  | Low risk                                      | Low risk                              | Low risk                       | Low risk                   | Low risk          |
| ABCD-2V. <sup>54</sup>          | 2006        | Low risk                          | Low risk                      | High risk                                     | Low risk                              | Low risk                       | Low risk                   | Low risk          |
| Katayama et al. <sup>55</sup>   | 2006        | Unclear risk                      | Low risk                      | High risk                                     | Low risk                              | Low risk                       | Low risk                   | Low risk          |
| Tong et al. <sup>56</sup>       | 2006        | Unclear risk                      | Unclear risk                  | Low risk                                      | Low risk                              | Low risk                       | Low risk                   | Low risk          |
| ADVANCE. <sup>57 58</sup>       | 2007        | Low risk                          | Low risk                      | Low risk                                      | Low risk                              | Low risk                       | Low risk                   | Low risk          |
| DIRECT-Prevent 1. <sup>59</sup> | 2008        | Low risk                          | Low risk                      | Low risk                                      | Low risk                              | Low risk                       | Low risk                   | Low risk          |
| DIRECT-Protect 1. <sup>59</sup> | 2008        | Low risk                          | Low risk                      | Low risk                                      | Low risk                              | Low risk                       | Low risk                   | Low risk          |
| DIRECT-Protect 2. <sup>60</sup> | 2008        | Low risk                          | Low risk                      | Low risk                                      | Low risk                              | Low risk                       | Low risk                   | Low risk          |
| GUARD. <sup>61</sup>            | 2008        | Low risk                          | Low risk                      | Low risk                                      | Low risk                              | Low risk                       | Low risk                   | Low risk          |
| Perrin et al. <sup>62</sup>     | 2008        | Unclear risk                      | Unclear risk                  | Low risk                                      | Unclear risk                          | Low risk                       | Low risk                   | Low risk          |
| Kohlmann et al. <sup>63</sup>   | 2009        | Unclear risk                      | Low risk                      | Low risk                                      | Low risk                              | Low risk                       | Low risk                   | Low risk          |
| Mehdi et al. <sup>64</sup>      | 2009        | Unclear risk                      | Unclear risk                  | Low risk                                      | Low risk                              | Low risk                       | Low risk                   | Low risk          |
| MITEC. <sup>65</sup>            | 2009        | Low risk                          | Unclear risk                  | Low risk                                      | Low risk                              | Low risk                       | Low risk                   | Low risk          |
| RASS. <sup>66</sup>             | 2009        | Low risk                          | Unclear risk                  | Low risk                                      | Low risk                              | Low risk                       | Low risk                   | Low risk          |
| ROADMAP. <sup>67</sup>          | 2011        | Low risk                          | Low risk                      | Low risk                                      | Low risk                              | Low risk                       | Low risk                   | Low risk          |

Supplementary Table C. Results of traditional pair-wise and Bayesian network meta-analyses

| Outcomes      | β-blocker        |                                                            | Placebo                                                    |                                                            | Diuretic |          | CCB                                                        |                                                            | ACEI                                                       |                                                            | ARB                                                        |                                                            | ACEI+diuretic                                              |          | ARB+diuretic |          | ACEI+CCB             |                      | ARB+CCB |          | ACEI+ARB             |          |
|---------------|------------------|------------------------------------------------------------|------------------------------------------------------------|------------------------------------------------------------|----------|----------|------------------------------------------------------------|------------------------------------------------------------|------------------------------------------------------------|------------------------------------------------------------|------------------------------------------------------------|------------------------------------------------------------|------------------------------------------------------------|----------|--------------|----------|----------------------|----------------------|---------|----------|----------------------|----------|
|               | OR               | (95% CI)                                                   | OR                                                         | (95% CI)                                                   | OR       | (95% CI) | OR                                                         | (95% CI)                                                   | OR                                                         | (95% CI)                                                   | OR                                                         | (95% CI)                                                   | OR                                                         | (95% CI) | OR           | (95% CI) | OR                   | (95% CI)             | OR      | (95% CI) | OR                   | (95% CI) |
| β-blocker     | All-cause deaths |                                                            |                                                            |                                                            |          |          | 0.18 ( 0.02 - 1.78 )                                       | <b>0.17 ( 0.04 - 0.87 )</b>                                |                                                            |                                                            |                                                            |                                                            |                                                            |          |              |          |                      |                      |         |          |                      |          |
|               | ESRD             |                                                            |                                                            |                                                            |          |          |                                                            |                                                            | 0.88 ( 0.17 - 4.68 )                                       |                                                            |                                                            |                                                            |                                                            |          |              |          |                      |                      |         |          |                      |          |
|               | DSC              |                                                            |                                                            |                                                            |          |          | 0.28 ( 0.05 - 1.68 )                                       | 0.13 ( 0.01 - 1.26 )                                       |                                                            |                                                            |                                                            |                                                            |                                                            |          |              |          |                      |                      |         |          |                      |          |
| Placebo       | All-cause deaths | <b>0.14 ( 0.02 - 0.73 )</b>                                |                                                            |                                                            |          |          | 0.86 ( 0.63 - 1.18 )                                       | 1.03 ( 0.88 - 1.21 )                                       | 1.05 ( 0.89 - 1.24 )                                       | <b>0.86 ( 0.75 - 0.98 )</b>                                |                                                            |                                                            |                                                            |          |              |          | 0.40 ( 0.08 - 2.06 ) |                      |         |          |                      |          |
|               | ESRD             | 1.14 ( 0.16 - 9.95 )                                       |                                                            |                                                            |          |          | 1.04 ( 0.77 - 1.41 )                                       | 0.69 ( 0.43 - 1.10 )                                       | <b>0.73 ( 0.60 - 0.89 )</b>                                | 1.19 ( 0.67 - 2.13 )                                       |                                                            |                                                            |                                                            |          |              |          |                      |                      |         |          |                      |          |
|               | DSC              | 0.21 ( 0.03 - 1.30 )                                       |                                                            |                                                            |          |          | 1.09 ( 0.84 - 1.43 )                                       | <b>0.60 ( 0.39 - 0.91 )</b>                                | <b>0.75 ( 0.63 - 0.89 )</b>                                | 1.23 ( 0.83 - 1.82 )                                       |                                                            |                                                            |                                                            |          |              |          |                      |                      |         |          |                      |          |
| Diuretic      | All-cause deaths | 0.30 ( 0.01 - 11.21 )                                      | 2.19 ( 0.17 - 55.7 )                                       |                                                            |          |          |                                                            |                                                            | 0.49 ( 0.04 - 5.47 )                                       | NA                                                         |                                                            |                                                            |                                                            |          |              |          |                      |                      |         |          |                      |          |
| CCB           | All-cause deaths | <b>0.14 ( 0.02 - 0.73 )</b>                                | 1.02 ( 0.74 - 1.46 )                                       | 0.46 ( 0.02 - 5.83 )                                       |          |          |                                                            |                                                            | 0.81 ( 0.48 - 1.37 )                                       | 1.03 ( 0.74 - 1.43 )                                       |                                                            |                                                            |                                                            |          |              |          |                      | 0.67 ( 0.18 - 2.43 ) |         |          |                      |          |
|               | ESRD             | 1.161 ( 0.15 - 10.51 )                                     | 1.01 ( 0.54 - 1.90 )                                       |                                                            |          |          |                                                            |                                                            | 0.77 ( 0.16 - 3.68 )                                       | 0.74 ( 0.54 - 1.01 )                                       |                                                            |                                                            |                                                            |          |              |          |                      |                      |         |          |                      |          |
|               | DSC              | 0.25 ( 0.04 - 1.50 )                                       | 1.18 ( 0.57 - 2.54 )                                       |                                                            |          |          |                                                            |                                                            | 0.47 ( 0.04 - 5.71 )                                       | <b>0.60 ( 0.45 - 0.80 )</b>                                |                                                            |                                                            |                                                            |          |              |          |                      |                      |         |          |                      |          |
| ACEI          | All-cause deaths | <b>0.14 ( 0.02 - 0.71 )</b>                                | 0.99 ( 0.73 - 1.26 )                                       | 0.44 ( 0.02 - 5.37 )                                       |          |          | 0.96 ( 0.64 - 1.35 )                                       |                                                            |                                                            |                                                            | 1.07 ( 0.37 - 3.13 )                                       | NA                                                         |                                                            |          |              |          |                      | 0.56 ( 0.16 - 1.95 ) |         |          | 3.24 ( 0.13 - 83.1 ) |          |
|               | ESRD             | 0.82 ( 0.12 - 6.43 )                                       | 0.71 ( 0.39 - 1.28 )                                       |                                                            |          |          | 0.70 ( 0.33 - 1.55 )                                       |                                                            |                                                            |                                                            | NA                                                         |                                                            |                                                            |          |              |          |                      |                      |         |          |                      |          |
|               | DSC              | <b>0.12 ( 0.02 - 0.74 )</b>                                | <b>0.58 ( 0.32 - 0.90 )</b>                                |                                                            |          |          | 0.50 ( 0.18 - 1.06 )                                       |                                                            |                                                            |                                                            |                                                            |                                                            |                                                            |          |              |          |                      |                      |         |          |                      |          |
| ARB           | All-cause deaths | <b>0.15 ( 0.03 - 0.79 )</b>                                | 1.08 ( 0.87 - 1.39 )                                       | 0.49 ( 0.02 - 6.26 )                                       |          |          | 1.06 ( 0.73 - 1.51 )                                       | 1.10 ( 0.80 - 1.61 )                                       |                                                            |                                                            |                                                            |                                                            |                                                            |          |              |          |                      |                      |         | NA       |                      |          |
|               | ESRD             | 0.84 ( 0.11 - 7.61 )                                       | 0.73 ( 0.43 - 1.25 )                                       |                                                            |          |          | 0.72 ( 0.37 - 1.42 )                                       | 1.04 ( 0.48 - 2.16 )                                       |                                                            |                                                            |                                                            |                                                            |                                                            |          |              |          |                      |                      |         |          |                      |          |
|               | DSC              | 0.16 ( 0.02 - 1.04 )                                       | 0.76 ( 0.47 - 1.32 )                                       |                                                            |          |          | 0.65 ( 0.30 - 1.40 )                                       | 1.30 ( 0.71 - 3.04 )                                       |                                                            |                                                            |                                                            |                                                            |                                                            |          |              |          |                      |                      |         |          |                      |          |
| ACEI+diuretic | All-cause deaths | <b>0.12 ( 0.02 - 0.66 )</b>                                | 0.86 ( 0.59 - 1.26 )                                       | 0.39 ( 0.02 - 5.03 )                                       |          |          | 0.85 ( 0.50 - 1.35 )                                       | 0.87 ( 0.57 - 1.43 )                                       | 0.80 ( 0.50 - 1.21 )                                       |                                                            |                                                            |                                                            |                                                            |          |              |          |                      | 0.50 ( 0.05 - 5.53 ) |         |          | 3.24 ( 0.13 - 83.1 ) |          |
|               | ESRD             | 1.38 ( 0.16 - 14.20 )                                      | 1.20 ( 0.50 - 2.93 )                                       |                                                            |          |          | 1.19 ( 0.40 - 3.51 )                                       | 1.70 ( 0.58 - 4.84 )                                       | 1.64 ( 0.59 - 4.60 )                                       |                                                            |                                                            |                                                            |                                                            |          |              |          |                      |                      |         |          |                      |          |
|               | DSC              | 0.25 ( 0.03 - 1.92 )                                       | 1.22 ( 0.49 - 3.03 )                                       |                                                            |          |          | 1.03 ( 0.31 - 3.27 )                                       | 2.09 ( 0.82 - 6.48 )                                       | 1.60 ( 0.55 - 4.38 )                                       |                                                            |                                                            |                                                            |                                                            |          |              |          |                      |                      |         |          |                      |          |
| ARB+diuretic  | All-cause deaths | $7.25 \times 10^3 ( 2.04 \times 10^3 - 5.41 \times 10^4 )$ | $7.06 \times 10^2 ( 2.07 \times 10^2 - 4.38 \times 10^3 )$ | $3.25 \times 10^2 ( 1.03 \times 10^2 - 2.43 \times 10^3 )$ |          |          | $6.89 \times 10^3 ( 1.88 \times 10^3 - 4.08 \times 10^4 )$ | $7.20 \times 10^3 ( 2.27 \times 10^3 - 4.60 \times 10^4 )$ | $6.58 \times 10^3 ( 1.84 \times 10^3 - 3.96 \times 10^4 )$ | $8.25 \times 10^3 ( 2.53 \times 10^3 - 4.69 \times 10^4 )$ |                                                            |                                                            |                                                            |          |              |          |                      |                      |         | NA       |                      |          |
| ACEI+CCB      | All-cause deaths | <b>0.07 ( 0.01 - 0.56 )</b>                                | 0.51 ( 0.15 - 1.35 )                                       | 0.21 ( 0.01 - 3.68 )                                       |          |          | 0.50 ( 0.14 - 1.30 )                                       | 0.52 ( 0.14 - 1.36 )                                       | 0.47 ( 0.13 - 1.26 )                                       | <b>0.59 ( 0.16 - 1.62 )</b>                                | <b>64.1 ( 1.23 \times 10^3 - 2.39 \times 10^5 )</b>        |                                                            |                                                            |          |              |          |                      |                      |         |          |                      |          |
| ARB+CCB       | All-cause deaths | $6.04 \times 10^3 ( 4.64 \times 10^3 - 5.93 \times 10^4 )$ | $4.42 \times 10^4 ( 2.81 \times 10^4 - 4.25 \times 10^5 )$ | $2.58 \times 10^4 ( 7.65 \times 10^3 - 2.11 \times 10^5 )$ |          |          | $4.55 \times 10^4 ( 2.81 \times 10^4 - 3.85 \times 10^5 )$ | $4.42 \times 10^4 ( 3.10 \times 10^4 - 4.65 \times 10^5 )$ | $4.04 \times 10^4 ( 2.54 \times 10^4 - 3.92 \times 10^5 )$ | $5.19 \times 10^4 ( 3.10 \times 10^4 - 4.99 \times 10^5 )$ | $8.70 \times 10^3 ( 6.48 \times 10^3 - 8.30 \times 10^4 )$ | $1.04 \times 10^4 ( 6.90 \times 10^3 - 7.29 \times 10^4 )$ |                                                            |          |              |          |                      |                      |         |          |                      |          |
| ACEI+ARB      | All-cause deaths | $2.23 \times 10^4 ( 21.3 - 1.27 \times 10^6 )$             | $2.10 \times 10^3 ( 90.7 - 7.26 \times 10^5 )$             | $7.80 \times 10^4 ( 34.7 - 2.28 \times 10^6 )$             |          |          | $2.16 \times 10^5 ( 85.6 - 9.88 \times 10^6 )$             | $2.18 \times 10^5 ( 93.0 - 7.26 \times 10^6 )$             | $1.90 \times 10^5 ( 83.2 - 6.57 \times 10^6 )$             | $2.44 \times 10^5 ( 107 - 8.44 \times 10^6 )$              | $3.90 \times 10^5 ( 6.01 \times 10^4 - 1.09 \times 10^6 )$ | $3.29 \times 10^5 ( 118 - 1.42 \times 10^7 )$              | $1.43 \times 10^5 ( 3.38 \times 10^4 - 2.74 \times 10^6 )$ |          |              |          |                      |                      |         |          |                      |          |

NOTE. Traditional pair-wise meta-analysis values are above the diagonal whereas Bayesian network meta-analysis values are below the diagonal. For values above the diagonal, values less than 1 reflect a decreased risk by the row-defining treatment. For values below the diagonal, values less than 1 reflect a decreased risk by the column-defining treatment. Numbers in bold denote a statistically significant difference. The result of a single trial is provided when traditional meta-analysis in a specific comparison is not feasible.

ACEI, angiotensin-converting enzyme inhibitor; ARB, angiotensin receptor blocker; CCB, calcium channel blocker; CI, confidence interval in direct comparison, credible interval in Bayesian network meta-analysis; DSC, doubling of serum creatinine; ESRD, end-stage renal disease; NA, not applicable in direct comparison due to zero events in both treatment arms; OR, odds ratio.

**Supplementary Table D. Assessment of inconsistency between direct and indirect evidence**

| <b>Treatment comparisons</b>        | <b>P value of node-splitting method</b> |
|-------------------------------------|-----------------------------------------|
| <b>All-cause mortality</b>          |                                         |
| ACEI+CCB vs Placebo                 | 0.71                                    |
| ACEI+CCB vs CCB                     | 0.81                                    |
| ACEI+CCB vs ACEI                    | 0.53                                    |
| ACEI+CCB vs ACEI+diuretic           | 0.74                                    |
| ACEI+diuretic vs Placebo            | 0.69                                    |
| ACEI+diuretic vs ACEI               | 0.48                                    |
| ARB vs Placebo                      | 0.59                                    |
| ARB vs Diuretic                     | 0.69                                    |
| ARB vs CCB                          | 0.52                                    |
| ARB vs ACEI                         | 0.82                                    |
| ACEI vs Placebo                     | 0.49                                    |
| ACEI vs CCB                         | 0.37                                    |
| CCB vs Beta-blocker                 | 0.60                                    |
| CCB vs Placebo                      | 0.15                                    |
| <b>End-stage renal disease</b>      |                                         |
| ARB vs Placebo                      | 0.65                                    |
| ARB vs CCB                          | 0.91                                    |
| ARB vs ACEI                         | 0.52                                    |
| ACEI vs Placebo                     | 0.87                                    |
| ACEI vs CCB                         | 0.87                                    |
| CCB vs Placebo                      | 0.82                                    |
| <b>Doubling of serum creatinine</b> |                                         |
| ARB vs CCB                          | 0.61                                    |
| ACEI vs Placebo                     | 0.77                                    |
| ACEI vs CCB                         | 0.98                                    |
| CCB vs Placebo                      | 0.64                                    |

Note.  $P < 0.05$  indicates significant inconsistency in the treatment comparison. ACEI, angiotensin-converting enzyme inhibitor; ARB, angiotensin receptor blocker; CCB, calcium channel blocker.

**Supplementary Table E. Results of network meta-analysis for treatments compared with the placebo in sensitivity analyses**

|               | Base case                                                                  | Omit Katayama <sup>55</sup>                                                | Omit Kohlmann <sup>63</sup>                                               | Omit Mehdi <sup>64</sup>                                                   | Omit Katayama, Kohlmann, Mehdi     | Omit DIABHYCAR <sup>49</sup>                                               | Omit ROADMAP <sup>67</sup>                                                  | Omit ADVANCE <sup>57 58</sup>                                              | Omit ACEI+CCB                                                              | Omit ACEI+diuretic                                                         |
|---------------|----------------------------------------------------------------------------|----------------------------------------------------------------------------|---------------------------------------------------------------------------|----------------------------------------------------------------------------|------------------------------------|----------------------------------------------------------------------------|-----------------------------------------------------------------------------|----------------------------------------------------------------------------|----------------------------------------------------------------------------|----------------------------------------------------------------------------|
| Treatment     | OR<br>95% CrI                                                              | OR<br>95% CrI                                                              | OR<br>95% CrI                                                             | OR<br>95% CrI                                                              | OR<br>95% CrI                      | OR<br>95% CrI                                                              | OR<br>95% CrI                                                               | OR<br>95% CrI                                                              | OR<br>95% CrI                                                              | OR<br>95% CrI                                                              |
| ACEI+CCB      | 0.51<br>(0.15-1.35)                                                        | 0.51<br>(0.16-1.35)                                                        | 0.52<br>(0.14-1.45)                                                       | 0.51<br>(0.17-1.35)                                                        | 0.51<br>(0.16-1.33)                | 0.48<br>(0.16-1.28)                                                        | 0.51<br>(0.16-1.24)                                                         | 0.51<br>(0.16-1.53)                                                        |                                                                            | 0.58<br>(0.15-1.49)                                                        |
| ACEI+diuretic | 0.86<br>(0.59-1.26)                                                        | 0.86<br>(0.59-1.26)                                                        | 0.86<br>(0.59-1.26)                                                       | 0.86<br>(0.60-1.25)                                                        | 0.86<br>(0.59-1.26)                | 0.86<br>(0.58-1.28)                                                        | 0.86<br>(0.62-1.22)                                                         | 1.34<br>(0.09-81.86)                                                       | 0.85<br>(0.58-1.24)                                                        |                                                                            |
| ACEI          | 0.99<br>(0.73-1.26)                                                        | 0.98<br>(0.72-1.26)                                                        | 0.98<br>(0.73-1.26)                                                       | 0.98<br>(0.74-1.25)                                                        | 0.98<br>(0.72-1.25)                | 0.84<br>(0.57-1.33)                                                        | 0.98<br>(0.74-1.23)                                                         | 0.99<br>(0.73-1.27)                                                        | 0.98<br>(0.74-1.25)                                                        | 0.98<br>(0.73-1.24)                                                        |
| CCB           | 1.02<br>(0.74-1.46)                                                        | 1.01<br>(0.74-1.48)                                                        | 1.03<br>(0.74-1.46)                                                       | 1.02<br>(0.74-1.46)                                                        | 1.02<br>(0.74-1.46)                | 0.98<br>(0.69-1.46)                                                        | 1.01<br>(0.72-1.41)                                                         | 1.02<br>(0.74-1.46)                                                        | 1.03<br>(0.74-1.44)                                                        | 1.03<br>(0.74-1.44)                                                        |
| ARB           | 1.08<br>(0.87-1.39)                                                        | 1.08<br>(0.87-1.40)                                                        | 1.08<br>(0.87-1.38)                                                       | 1.08<br>(0.87-1.39)                                                        | 1.08<br>(0.87-1.40)                | 1.06<br>(0.86-1.38)                                                        | 1.03<br>(0.82-1.31)                                                         | 1.08<br>(0.87-1.39)                                                        | 1.08<br>(0.87-1.38)                                                        | 1.08<br>(0.87-1.38)                                                        |
| Diuretic      | 2.19<br>(0.17-55.70)                                                       | 2.94<br>(0.25-104.79)                                                      | 2.73<br>(0.24-76.55)                                                      | 2.33<br>(0.22-202.35)                                                      | 3.00<br>(0.23-62.24)               | 2.12<br>(0.16-34.88)                                                       | 2.67<br>(0.14-114.78)                                                       | 2.25<br>(0.17-99.68)                                                       | 2.29<br>(0.16-49.95)                                                       | 2.08<br>(0.14-46.43)                                                       |
| β-blocker     | <b>7.13</b><br><b>(1.37-41.39)</b>                                         | <b>6.24</b><br><b>(1.52-40.37)</b>                                         | <b>6.25</b><br><b>(1.39-34.09)</b>                                        | <b>6.55</b><br><b>(1.18-39.41)</b>                                         | <b>6.53</b><br><b>(1.66-42.48)</b> | <b>6.53</b><br><b>(1.29-35.59)</b>                                         | <b>6.97</b><br><b>(1.62-44.70)</b>                                          | <b>6.56</b><br><b>(1.54-31.25)</b>                                         | <b>5.76</b><br><b>(1.75-41.85)</b>                                         | <b>6.83</b><br><b>(1.63-47.09)</b>                                         |
| ARB+CCB*      | 4.42×10 <sup>-14</sup><br>(2.81×10 <sup>-51</sup> – 4.25×10 <sup>5</sup> ) |                                                                            | 9.30×10 <sup>4</sup><br>(1.21×10 <sup>-42</sup> – 5.96×10 <sup>29</sup> ) | 3.87×10 <sup>-5</sup><br>(1.87×10 <sup>-21</sup> – 1.31×10 <sup>12</sup> ) |                                    | 2.24<br>(3.83×10 <sup>-20</sup> – 1.60×10 <sup>28</sup> )                  | 3.80×10 <sup>10</sup><br>(1.88×10 <sup>-8</sup> – 3.92×10 <sup>32</sup> )   | 9.61×10 <sup>-4</sup><br>(1.69×10 <sup>-22</sup> – 2.00×10 <sup>25</sup> ) | 1.59×10 <sup>-5</sup><br>(1.01×10 <sup>-26</sup> – 5.45×10 <sup>13</sup> ) | 0.11<br>(1.33×10 <sup>-30</sup> – 2.28×10 <sup>10</sup> )                  |
| ARB+diuretic* | 7.06×10 <sup>-3</sup><br>(2.07×10 <sup>-27</sup> – 4.38×10 <sup>17</sup> ) | 3.04×10 <sup>-5</sup><br>(2.86×10 <sup>-58</sup> – 5.05×10 <sup>31</sup> ) |                                                                           | 2.23×10 <sup>-13</sup><br>(1.27×10 <sup>-33</sup> – 2.72)                  |                                    | 4.54×10 <sup>-32</sup><br>(1.07×10 <sup>-64</sup> – 3.03×10 <sup>8</sup> ) | 3.15×10 <sup>-10</sup><br>(5.68×10 <sup>-53</sup> – 6.11×10 <sup>31</sup> ) | 20.84<br>(5.92×10 <sup>-15</sup> – 9.24×10 <sup>18</sup> )                 |                                                                            | 8.23×10 <sup>-7</sup><br>(1.40×10 <sup>-36</sup> – 7.79×10 <sup>18</sup> ) |
| ACEI+ARB*     | 2.10×10 <sup>15</sup><br>(90.74 – 7.26×10 <sup>26</sup> )                  | 3.01×10 <sup>19</sup><br>(23.43 – 2.96×10 <sup>44</sup> )                  | 2.34×10 <sup>19</sup><br>(2.37×10 <sup>3</sup> – 5.04×10 <sup>32</sup> )  |                                                                            |                                    | 3.89×10 <sup>28</sup><br>(1.63×10 <sup>13</sup> – 3.81×10 <sup>83</sup> )  | 1.19×10 <sup>18</sup><br>(3.43 – 1.30×10 <sup>35</sup> )                    | 2.83×10 <sup>15</sup><br>(3.99 – 1.44×10 <sup>25</sup> )                   | 1.41×10 <sup>21</sup><br>(23.90 – 5.84×10 <sup>52</sup> )                  | 1.32×10 <sup>19</sup><br>(295.60 – 3.46×10 <sup>42</sup> )                 |

NOTE. See panel for full trial names. Numbers in bold denote a statistically significant difference. ACEI, angiotensin-converting enzyme inhibitor; ARB, angiotensin receptor blocker; CCB, calcium channel blocker; CrI, credible interval; OR, odds ratio.

\*Extremely wide CrI owing to small patient numbers and rare death events among treatment arm.

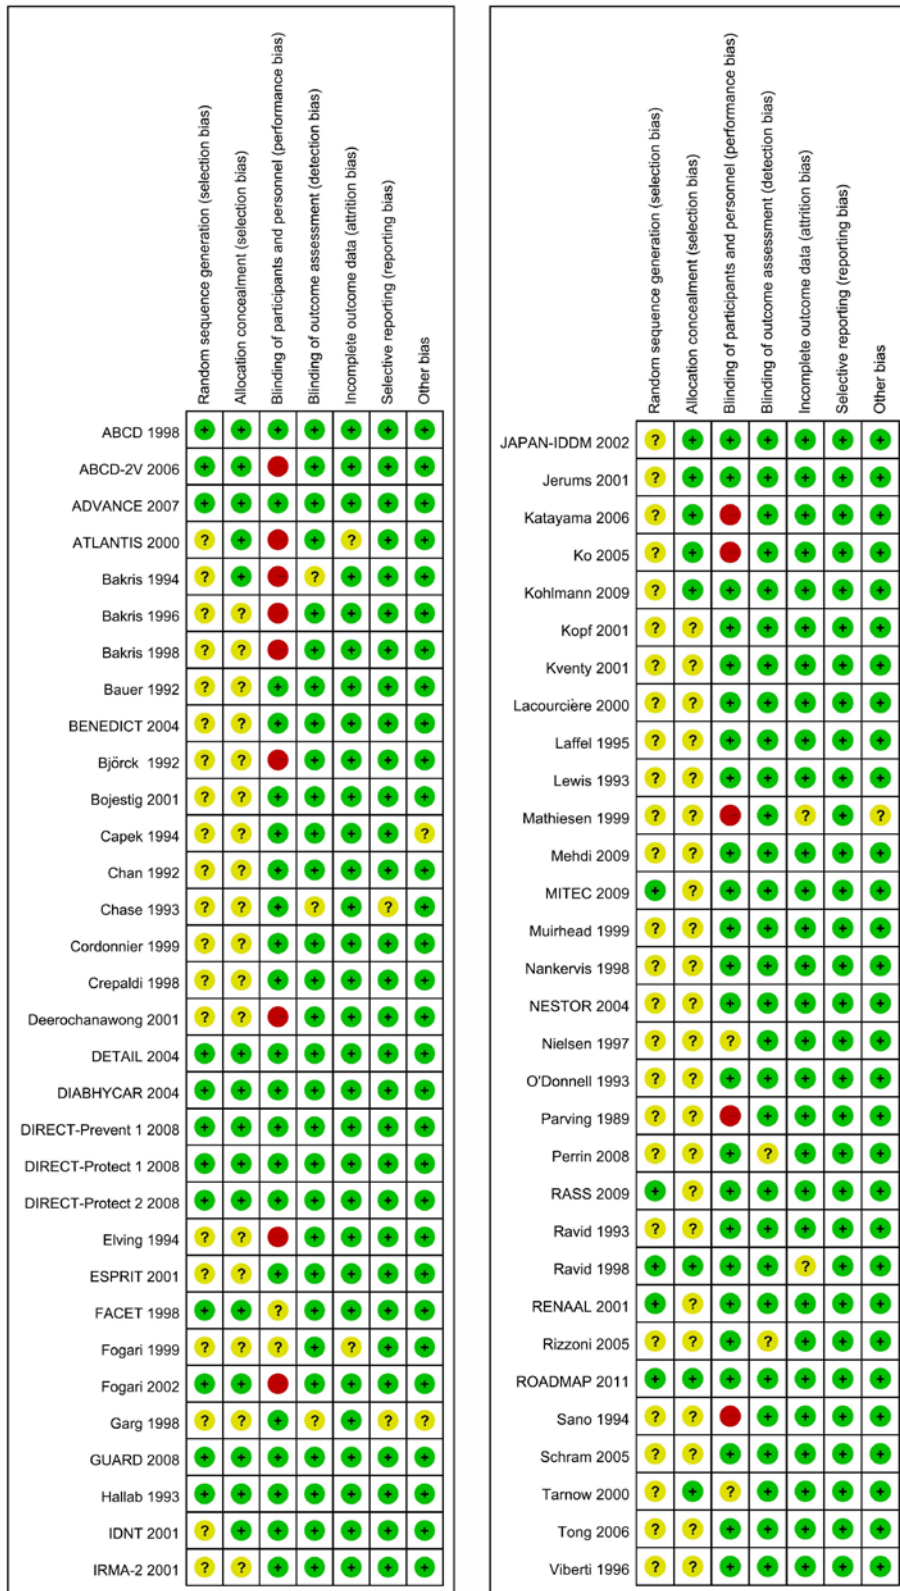

**Supplementary Figure A.** Summary for risk of bias of included clinical trials. The green symbols represent low risk of bias, the yellow symbols represent unclear risk of bias, and the red symbols represent high risk of bias. The figure was generated using Review Manager Version 5.1.

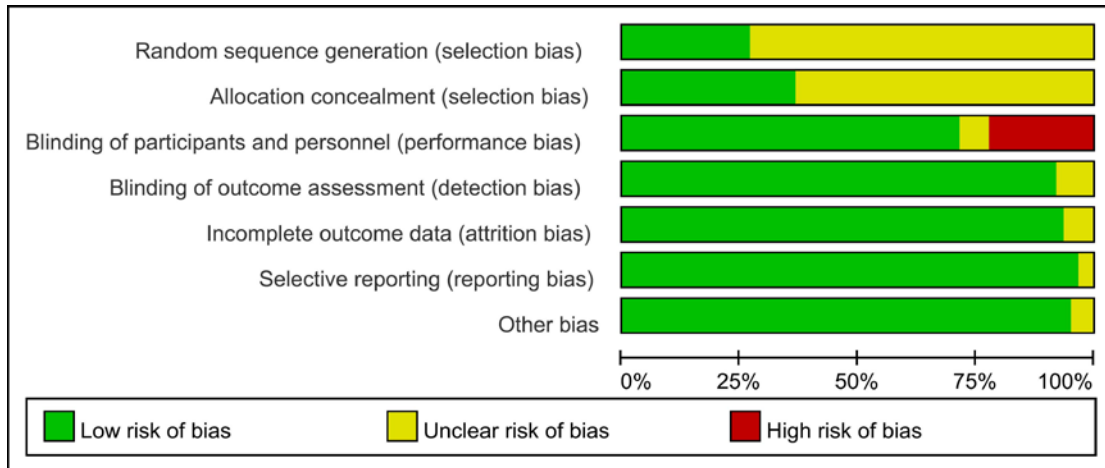

**Supplementary Figure B.** Risk of bias graph of included clinical trials. Each methodological quality item is presented as percentages across all included studies. The figure was generated using Review Manager Version 5.1.



## Supplementary References :

### References of studies included in network meta-analysis

1. Parving HH, Hommel E, Damkjaer Nielsen M, Giese J. Effect of captopril on blood pressure and kidney function in normotensive insulin dependent diabetics with nephropathy. *BMJ* 1989; 299: 533-6.
2. Parving HH, Hommel E, Jensen BR, Hansen HP. Long-term beneficial effect of ACE inhibition on diabetic nephropathy in normotensive type 1 diabetic patients. *Kidney Int* 2001; 60: 228-34.
3. Bauer JH, Reams GP, Hewett J, Klachko D, Lau A, Messina C, et al. A randomized, double-blind, placebo-controlled trial to evaluate the effect of enalapril in patients with clinical diabetic nephropathy. *Am J Kidney Dis* 1992; 20: 443-57.
4. Bjorck S, Mulec H, Johnsen SA, Norden G, Aurell M. Renal protective effect of enalapril in diabetic nephropathy. *BMJ* 1992; 304: 339-43.
5. Chan JC, Cockram CS, Nicholls MG, Cheung CK, Swaminathan R. Comparison of enalapril and nifedipine in treating non-insulin dependent diabetes associated with hypertension: one year analysis. *BMJ* 1992; 305: 981-5.
6. Chase HP, Garg SK, Harris S, Hoops S, Jackson WE, Holmes DL. Angiotensin-converting enzyme inhibitor treatment for young normotensive diabetic subjects: a two-year trial. *Ann Ophthalmol* 1993; 25: 284-9.
7. Hallab M, Gallois Y, Chatellier G, Rohmer V, Fressinaud P, Marre M. Comparison of reduction in microalbuminuria by enalapril and hydrochlorothiazide in normotensive patients with insulin dependent diabetes. *BMJ* 1993; 306: 175-82.
8. Lewis EJ, Hunsicker LG, Bain RP, Rohde RD. The effect of angiotensin-converting-enzyme inhibition on diabetic nephropathy. The Collaborative Study Group. *N Engl J Med* 1993; 329: 1456-62.
9. O'Donnell MJ, Rowe BR, Lawson N, Horton A, Gyde OH, Barnett AH. Placebo-controlled trial of lisinopril in normotensive diabetic patients with incipient nephropathy. *J Hum Hypertens* 1993; 7: 327-32.
10. Ravid M, Savin H, Jutrin I, Bental T, Katz B, Lishner M. Long-term stabilizing effect of angiotensin-converting enzyme inhibition on plasma creatinine and on proteinuria in normotensive type II diabetic patients. *Ann Intern Med* 1993; 118: 577-81.
11. Bakris GL, Slataper R, Vicknair N, Sadler R. ACE inhibitor mediated reductions in renal size and microalbuminuria in normotensive, diabetic subjects. *J Diabetes Complications* 1994; 8: 2-6.
12. Capek M, Schnack C, Ludvik B, Kautzky-Willer A, Banyai M, Prager R. Effects of captopril treatment versus placebo on renal function in type 2 diabetic patients with microalbuminuria: a long-term study. *Clin Investig* 1994; 72: 961-6.
13. Elving LD, Wetzels JF, van Lier HJ, de Nobel E, Berden JH. Captopril and atenolol are equally effective in retarding progression of diabetic nephropathy. Results of a 2-year

- prospective, randomized study. *Diabetologia* 1994; 37: 604-9.
14. Sano T, Kawamura T, Matsumae H, Sasaki H, Nakayama M, Hara T, et al. Effects of long-term enalapril treatment on persistent micro-albuminuria in well-controlled hypertensive and normotensive NIDDM patients. *Diabetes Care* 1994; 17: 420-4.
  15. Laffel LM, McGill JB, Gans DJ. The beneficial effect of angiotensin-converting enzyme inhibition with captopril on diabetic nephropathy in normotensive IDDM patients with microalbuminuria. North American Microalbuminuria Study Group. *Am J Med* 1995; 99: 497-504.
  16. Bakris GL, Copley JB, Vicknair N, Sadler R, Leurgans S. Calcium channel blockers versus other antihypertensive therapies on progression of NIDDM associated nephropathy. *Kidney Int* 1996; 50: 1641-50.
  17. Captopril reduces the risk of nephropathy in IDDM patients with microalbuminuria. The Microalbuminuria Captopril Study Group. *Diabetologia* 1996; 39: 587-93.
  18. Nielsen FS, Rossing P, Gall MA, Skott P, Smidt UM, Parving HH. Impact of lisinopril and atenolol on kidney function in hypertensive NIDDM subjects with diabetic nephropathy. *Diabetes* 1994; 43: 1108-13.
  19. Nielsen FS, Rossing P, Gall MA, Skott P, Smidt UM, Parving HH. Long-term effect of lisinopril and atenolol on kidney function in hypertensive NIDDM subjects with diabetic nephropathy. *Diabetes* 1997; 46: 1182-8.
  20. Estacio RO, Jeffers BW, Hiatt WR, Biggerstaff SL, Gifford N, Schrier RW. The effect of nisoldipine as compared with enalapril on cardiovascular outcomes in patients with non-insulin-dependent diabetes and hypertension. *N Engl J Med* 1998; 338: 645-52.
  21. Bakris GL, Weir MR, DeQuattro V, McMahon FG. Effects of an ACE inhibitor/calcium antagonist combination on proteinuria in diabetic nephropathy. *Kidney Int* 1998; 54: 1283-9.
  22. Crepaldi G, Carta Q, Deferrari G, Mangili R, Navalesi R, Santeusano F, et al. Effects of lisinopril and nifedipine on the progression to overt albuminuria in IDDM patients with incipient nephropathy and normal blood pressure. The Italian Microalbuminuria Study Group in IDDM. *Diabetes Care* 1998; 21: 104-10.
  23. Tatti P, Pahor M, Byington RP, Di Mauro P, Guarisco R, Strollo G, et al. Outcome results of the Fosinopril Versus Amlodipine Cardiovascular Events Randomized Trial (FACET) in patients with hypertension and NIDDM. *Diabetes Care* 1998; 21: 597-603.
  24. Garg SK, Chase HP, Jackson WE, Harris S, Carmain JA, Hansen MH. Renal and retinal changes after treatment with Ramipril and pentoxifylline in subjects with IDDM. *Annals of Ophthalmology-Glaucoma* 1998; 30: 33-7.
  25. Nankervis A, Nicholls K, Kilmartin G, Allen P, Ratnaik S, Martin FI. Effects of perindopril on renal histomorphometry in diabetic subjects with microalbuminuria: a 3-year placebo-controlled biopsy study. *Metabolism* 1998; 47: 12-5.
  26. Ravid M, Brosh D, Levi Z, Bar-Dayyan Y, Ravid D, Rachmani R. Use of enalapril to attenuate decline in renal function in normotensive, normoalbuminuric patients with

- type 2 diabetes mellitus. A randomized, controlled trial. *Ann Intern Med* 1998; 128: 982-8.
27. Cordonnier DJ, Pinel N, Barro C, Maynard M, Zaoui P, Halimi S, et al. Expansion of cortical interstitium is limited by converting enzyme inhibition in type 2 diabetic patients with glomerulosclerosis. The Diabiopsies Group. *J Am Soc Nephrol* 1999; 10: 1253-63.
  28. Fogari R, Zoppi A, Corradi L, Mugellini A, Lazzari P, Preti P, et al. Long-term effects of ramipril and nitrendipine on albuminuria in hypertensive patients with type II diabetes and impaired renal function. *J Hum Hypertens* 1999; 13: 47-53.
  29. Mathiesen ER, Hommel E, Giese J, Parving HH. Efficacy of captopril in postponing nephropathy in normotensive insulin dependent diabetic patients with microalbuminuria. *BMJ* 1991; 303: 81-7.
  30. Mathiesen ER, Hommel E, Hansen HP, Smidt UM, Parving HH. Randomised controlled trial of long term efficacy of captopril on preservation of kidney function in normotensive patients with insulin dependent diabetes and microalbuminuria. *BMJ* 1999; 319: 24-5.
  31. Muirhead N, Feagan BF, Mahon J, Lewanczuk RZ, Rodger NW, Botteri F. The effects of valsartan and captopril on reducing microalbuminuria in patients with type 2 diabetes mellitus: A placebo-controlled trial. *Current Therapeutic Research, Clinical & Experimental* 1999; 60: 650-60.
  32. O'Hare P, Bilbous R, Mitchell T, CJ OC, Viberti GC. Low-dose ramipril reduces microalbuminuria in type 1 diabetic patients without hypertension: results of a randomized controlled trial. *Diabetes Care* 2000; 23: 1823-9.
  33. Lacourciere Y, Belanger A, Godin C, Halle JP, Ross S, Wright N, et al. Long-term comparison of losartan and enalapril on kidney function in hypertensive type 2 diabetics with early nephropathy. *Kidney Int* 2000; 58: 762-9.
  34. Tarnow L, Rossing P, Jensen C, Hansen BV, Parving HH. Long-term renoprotective effect of nisoldipine and lisinopril in type 1 diabetic patients with diabetic nephropathy. *Diabetes Care* 2000; 23: 1725-30.
  35. Bojestig M, Karlberg BE, Lindstrom T, Nystrom FH. Reduction of ACE activity is insufficient to decrease microalbuminuria in normotensive patients with type 1 diabetes. *Diabetes Care* 2001; 24: 919-24.
  36. Deerochanawong C, Kornthong P, Phongwiratchai S, Serirat S. Effects on urinary albumin excretion and renal function changes by delapril and manidipine in normotensive type 2 diabetic patients with microalbuminuria. *J Med Assoc Thai* 2001; 84: 234-41.
  37. Effect of 3 years of antihypertensive therapy on renal structure in type 1 diabetic patients with albuminuria: the European Study for the Prevention of Renal Disease in Type 1 Diabetes (ESPRIT). *Diabetes* 2001; 50: 843-50.
  38. Lewis EJ, Hunsicker LG, Clarke WR, Berl T, Pohl MA, Lewis JB, et al. Renoprotective

- effect of the angiotensin-receptor antagonist irbesartan in patients with nephropathy due to type 2 diabetes. *N Engl J Med* 2001; 345: 851-60.
39. Parving HH, Lehnert H, Brochner-Mortensen J, Gomis R, Andersen S, Arner P. The effect of irbesartan on the development of diabetic nephropathy in patients with type 2 diabetes. *N Engl J Med* 2001; 345: 870-8.
  40. Jerums G, Allen TJ, Campbell DJ, Cooper ME, Gilbert RE, Hammond JJ, et al. Long-term comparison between perindopril and nifedipine in normotensive patients with type 1 diabetes and microalbuminuria. *Am J Kidney Dis* 2001; 37: 890-9.
  41. Kopf D, Schmitz H, Beyer J, Frank M, Bockisch A, Lehnert H. A double-blind trial of perindopril and nitrendipine in incipient diabetic nephropathy. *Diabetes Nutr Metab* 2001; 14: 245-52.
  42. Kvetny J, Gregersen G, Pedersen RS. Randomized placebo-controlled trial of perindopril in normotensive, normoalbuminuric patients with type 1 diabetes mellitus. *QJM* 2001; 94: 89-94.
  43. Brenner BM, Cooper ME, de Zeeuw D, Keane WF, Mitch WE, Parving HH, et al. Effects of losartan on renal and cardiovascular outcomes in patients with type 2 diabetes and nephropathy. *N Engl J Med* 2001; 345: 861-9.
  44. Fogari R, Preti P, Zoppi A, Rinaldi A, Corradi L, Pasotti C, et al. Effects of amlodipine fosinopril combination on microalbuminuria in hypertensive type 2 diabetic patients. *Am J Hypertens* 2002; 15: 1042-9.
  45. Katayama S, Kikkawa R, Isogai S, Sasaki N, Matsuura N, Tajima N, et al. Effect of captopril or imidapril on the progression of diabetic nephropathy in Japanese with type 1 diabetes mellitus: a randomized controlled study (JAPAN-IDDM). *Diabetes Res Clin Pract* 2002; 55: 113-21.
  46. Ruggenti P, Fassi A, Ilieva AP, Bruno S, Iliev IP, Brusegan V, et al. Preventing microalbuminuria in type 2 diabetes. *N Engl J Med* 2004; 351: 1941-51.
  47. Barnett AH, Bain SC, Bouter P, Karlberg B, Madsbad S, Jervell J, et al. Angiotensin-receptor blockade versus converting-enzyme inhibition in type 2 diabetes and nephropathy. *N Engl J Med* 2004; 351: 1952-61.
  48. Barnett A. Preventing renal complications in type 2 diabetes: results of the diabetics exposed to telmisartan and enalapril trial. *J Am Soc Nephrol* 2006; 17: S132-5.
  49. Marre M, Lievre M, Chatellier G, Mann JF, Passa P, Menard J. Effects of low dose ramipril on cardiovascular and renal outcomes in patients with type 2 diabetes and raised excretion of urinary albumin: randomised, double blind, placebo controlled trial (the DIABHYCAR study). *BMJ* 2004; 328: 495.
  50. Marre M, Puig JG, Kokot F, Fernandez M, Jermendy G, Opie L, et al. Equivalence of indapamide SR and enalapril on microalbuminuria reduction in hypertensive patients with type 2 diabetes: the NESTOR Study. *J Hypertens* 2004; 22: 1613-22.
  51. Ko GT, Tsang CC, Chan HC. Stabilization and regression of albuminuria in Chinese patients with type 2 diabetes: a one-year randomized study of valsartan versus enalapril.

- Adv Ther* 2005; 22: 155-62.
52. Rizzoni D. Effect of Treatment With Candesartan or Enalapril on Subcutaneous Small Artery Structure in Hypertensive Patients With Noninsulin-Dependent Diabetes Mellitus. *Hypertension* 2005; 45: 659-65.
  53. Schram MT, van Ittersum FJ, Spoelstra-de Man A, van Dijk RA, Schalkwijk CG, Ijzerman RG, et al. Aggressive antihypertensive therapy based on hydrochlorothiazide, candesartan or lisinopril as initial choice in hypertensive type II diabetic individuals: effects on albumin excretion, endothelial function and inflammation in a double-blind, randomized clinical trial. *J Hum Hypertens* 2005; 19: 429-37.
  54. Estacio RO, Coll JR, Tran ZV, Schrier RW. Effect of intensive blood pressure control with valsartan on urinary albumin excretion in normotensive patients with type 2 diabetes. *Am J Hypertens* 2006; 19: 1241-8.
  55. Katayama K, Nomura S, Ishikawa H, Murata T, Koyabu S, Nakano T. Comparison between valsartan and valsartan plus cilnidipine in type II diabetics with normo- and microalbuminuria. *Kidney Int* 2006; 70: 151-6.
  56. Tong PC, Ko GT, Chan WB, Ma RC, So WY, Lo MK, et al. The efficacy and tolerability of fosinopril in Chinese type 2 diabetic patients with moderate renal insufficiency. *Diabetes Obes Metab* 2006; 8: 342-7.
  57. Patel A, MacMahon S, Chalmers J, Neal B, Woodward M, Billot L, et al. Effects of a fixed combination of perindopril and indapamide on macrovascular and microvascular outcomes in patients with type 2 diabetes mellitus (the ADVANCE trial): a randomised controlled trial. *Lancet* 2007; 370: 829-40.
  58. de Galan BE, Perkovic V, Ninomiya T, Pillai A, Patel A, Cass A, et al. Lowering blood pressure reduces renal events in type 2 diabetes. *J Am Soc Nephrol* 2009; 20: 883-92.
  59. Chaturvedi N, Porta M, Klein R, Orchard T, Fuller J, Parving HH, et al. Effect of candesartan on prevention (DIRECT-Prevent 1) and progression (DIRECT-Protect 1) of retinopathy in type 1 diabetes: randomised, placebo-controlled trials. *Lancet* 2008; 372: 1394-402.
  60. Sjolie AK, Klein R, Porta M, Orchard T, Fuller J, Parving HH, et al. Effect of candesartan on progression and regression of retinopathy in type 2 diabetes (DIRECT-Protect 2): a randomised placebo-controlled trial. *Lancet* 2008; 372: 1385-93.
  61. Bakris GL, Toto RD, McCullough PA, Rocha R, Purkayastha D, Davis P. Effects of different ACE inhibitor combinations on albuminuria: results of the GUARD study. *Kidney Int* 2008; 73: 1303-9.
  62. Perrin NE, Jaremko GA, Berg UB. The effects of candesartan on diabetes glomerulopathy: a double-blind, placebo-controlled trial. *Pediatr Nephrol* 2008; 23: 947-54.
  63. Kohlmann O, Jr., Roca-Cusachs A, Laurent S, Schmieder RE, Wenzel RR, Fogari R. Fixed-dose manidipine/delapril versus losartan/hydrochlorothiazide in hypertensive patients with type 2 diabetes and microalbuminuria. *Adv Ther* 2009; 26: 313-24.

64. Mehdi UF, Adams-Huet B, Raskin P, Vega GL, Toto RD. Addition of angiotensin receptor blockade or mineralocorticoid antagonism to maximal angiotensin-converting enzyme inhibition in diabetic nephropathy. *J Am Soc Nephrol* 2009; 20: 2641-50.
65. Baguet JP, Asmar R, Valensi P, Nisse-Durgeat S, Mallion JM. Effects of candesartan cilexetil on carotid remodeling in hypertensive diabetic patients: the MITEC study. *Vasc Health Risk Manag* 2009; 5: 175-83.
66. Mauer M, Zinman B, Gardiner R, Suissa S, Sinaiko A, Strand T, et al. Renal and retinal effects of enalapril and losartan in type 1 diabetes. *N Engl J Med* 2009; 361: 40-51.
67. Haller H, Ito S, Izzo JL, Jr., Januszewicz A, Katayama S, Menne J, et al. Olmesartan for the delay or prevention of microalbuminuria in type 2 diabetes. *N Engl J Med* 2011; 364: 907-17.
